# Supplementary material for: Identification of an Interferon-Stimulated Long Noncoding RNA (LncRNA ISR) Involved in Regulation of Influenza A Virus Replication
Source: MDPI journal article supplement (doi:10.3390/ijms20205118), 2019-10-16
Supplement: s1 [file s1]

## Figure S1

Homology alignment of M-ISR and H-ISR

M-1SR H-1SR ACAACGGGGAAGAAGGAATATGCTGACCAACACTGGCTGGCCATAGCGGGCGGAGAGGGGGCTGAGGCACAGATGACTGTAACTGAAGGGGACGGGCTTGGCTCTCT  
TGC CCCCCAGGGGACAGGCCCTACGAGCTAGCTACTACTGTTGAAACCTGGCTCTCTGACAGACGGTACCTTACAGGCTGGAGGGCACTGTAACACTGGAGAGAGGGCAGAGGCC  
M-1SR H-1SR TCCCTCTGTGTCTCGAACCCTGAGACTACGCCCTCCGACCTGCCACAGAAGTAGAGGCCGGTGTGAAGCTGGGACATGACCCTCTGCTGCCACAGCATGTCAAAGCCCTCTCTC  
M-1SR H-1SR CACTCCCGACGTGCTTGAGATGATGGGTAGTATCTTCACTGCCCTGGTAGAATAGACATAACACAAGGATATGGGAGAGATATTTAAATATCATCAATGCTCAACGATCAT  
CAAGAGATATTTAAATCAACCTCGCTCAGGACAGTGTCT  
M-1SR H-1SR TTT---CTTTCTCTTCCCGACTATAAATCTAGAAGGGTAGAAATATGGTGAAGAGAAAAAAGAGAAAGCAATACGCTACAGAGAGAAAGCAGAGCTGGTGAGGCTCCAGCT  
TTTCTCTCTCTTCCGACTTACAACCTTAGAGAG---AAAAAGAGAGGAGAGAGAGAGAGAGGAGCCCTGCCAACAGGCCAGGG  
M-1SR H-1SR GGAAGACAGACGGCGCTGTGGGGTGACCCGAGCTGGGGCACTGCTGGGGCTTCCAGCATCAACTCTGTC---CGGGAATACGGGGGCTCTTTAATTAATAG  
AGGAGAGGAGAGG---GTGGGGCAACCCGGGAGCTGGGGAGGCTCCCACTGGGGGGTCCCACTTCAATCTCTGGCCCTTCAAAATCGAGAGCCCTTAGCAATAT  
M-1SR H-1SR CAATTTCAGAAATTTTTTTTAAAGAAAGAAATGTATTTTTCTTCTGTACGCTGCTCCCTCCCAAGATTTTTCCCTCTAGCGGCTGTCTGGCATCCGTTTAAATCCAAACATTAAT  
CAATTTCAGAAATTTTTTTTAAAGAAATGATCTTTTTTCTAGCTGGCTCCCTTTTTCGACGTTTCTTTTAGCCCGCTCTCTGCATCGCTTTTAATCCAGCAATATTT  
M-1SR H-1SR GTAATCCCATTAAGACAGATATAATTTTATTTACTTACCTGAGGTTTCACTCAAGCTATAATAATATACGTGTACTGGCAAACTGAAAAATAAGAGCGGCAATATATTTCTGTAGTTTGTAGAA  
GTAATCCCATTAAGACAGATATAATTTTATAGTATTACAGATCTCAAGCTACCAATAATACGTGTACTGCCAATTTTGTTTTTAAAGGCG---ACAACATTTCTGTAGTTTGTAGAA  
M-1SR H-1SR TAAACTGTAAACAAAAGACGGAGCTGGAGGGGTACCCATCAGGTCCTACG-AGCAATCCCTCAG-  
CAAACTGTAAACAAAAGCACCC-ATGTACAGGGGTACCCGGGGGCTCCCTAGCGAGCGCTGCCCGCAATCTCCCGCGAATCTACCCGGCGGCGCTGGTGAACCTTAGGGCTTAGGGCGCT  
M-1SR H-1SR ---GCTCCCGCACTGCCCGACGGTGTGATGATCTCCCGGCGAGTGGGGTTCGCTCGAGAG---ACCGGCTACGGCTACAGAGAGAGAGCTCGGGG---AAGGGACATCAGAG  
GTAGCTGCCCTACCTCGACTCTCGGACACTATATCAAGCGACCGGAGAGAGGGCTGCCCTGGAGGCTGGGGCGCTCTGGCAAGCATGTACTCTTCGGCGAGGAGTCAGAG  
M-1SR H-1SR TGGGCGCGAACAAGGGGGCTGCCGAGATGATCAGAACACTCGGGTCTCTGTGTTTGAAGCTAAAGCGCAGG GACTCGCTTCACCGA  
GGACCCCGAGAGATGCTCTCTGGAGGACGACAGAGCTCTCTCTGTGAGGCTGCTCTCTCTCTGTGAGCAAACTGGCGCGCATCTGAGGCTGAGGCTGAGGCTGAGGCTGAGGCT  
M-1SR H-1SR AATCCCGAGGGGGCGGCGCTCTGAG---TTCGGCGGTGGGAGTGGCG---GTCCGCACTGGGCGACGCTTGTGTGGGCTAGAGGAGATTA  
AATCTTGAAGGGCGGCGCGCGCACCCGACCGCGCGCGCGGCTGCCCTCTCCCGGGCGCAGGCTGAGAGAGTGGGCGCACTGTG-CCAGCTTGTAGTCTTGAAGGAGGCTGAGGCT  
M-1SR H-1SR CCAAGGCACTGTTAAGGCGACTATCCCTGCAAAACCATCTGCCGCTGACACTCAAGGCTTTATATAGAACAAGATTTTCTGCTTTACACAGAGATTCOCATTAGCGCTG  
CCAGAGGCACTGCTTGAAGCAAGTACCTCCG-CAAAACCATCTGCCGCTGACACTTAAAGGCTTTATATAGAACAAGATTTCGCTGTTACACAGAGATTCOCATTAGCGCTG  
M-1SR H-1SR CCGGGCGACACTGCTCTCTAATCGGAGGGCGG- GAGCGAGCCTTGGCTCCCTCCCGCGCACACAGCGCTTGTCTTCCGAGAGAGAGCGCTGTGCTGCCAGCGGCGAGCTGCTT  
CCGGGCGACACACACTTAATCGGAGGGCGGGGAGTGGTCCCTCCCGCGCACACAGCGCTTGTCTTCCGAGAGAGAGCGCTGTGCTGCCAGCGGCGAGCTGCTT  
M-1SR H-1SR AAG AGTCATATCTTTGAATGTGTGCCCACTCAGCCCGAGTGGAGCGGCTCCCGCGACCCCGACATGTGCGACACCCAGACTGGGCTCCGAGAGTCTGGGAGCGCC  
ACACTTCTACACTCGCTGGCTGCTCCCGAGCGGAGGACCTGTGTC---CCGACAGAGCTAGAGCGAGGCTGAGGCTGAGGCTGAGGCTGAGGCTGAGGCTGAGGCTGAGGCT  
M-1SR H-1SR TCGACGCGACCGGATCACTGGGCGCTAGCGCGAGTGGTGGCTGTCTCCGAGGCGGAGCTTCCGCGGCTTGGCGGGATCACTTAACAAAGGTGGTTTTCGTGTGGCAG  
GCACCGGACCGGATCACTTGGGCGGACGCGCGAGTGGCGGCTGTCTCCGAGCGGGAGCTTC---  
M-1SR H-1SR CTAGTGGACCTTGAAGGAGCAGACAGCAAGCTAGCTACGCTTCTCGGCTTGGGTCGACGAGACCGGTGCTCGGGTCTTCAGACCCATCTGGAGAGGGCGGGTAAAT  
ATGACCTCTCTCTTTTCTTCTACCCCTCCCATCGCGAAGTCTGCTCCCGCGAAATCGGAGACAATTCAACTCTGAGAGGAGCAACCGACAGCAAGAAATAAAGTACACCA  
M-1SR H-1SR CCAAGCAGTGTGAGCAAAATCTCTGGCGCTCTCCATTGGAATACCTTCTCTCTTATTTCCGAAATACGATTGTTTAACTCATCTCAGTTTCCATTAGAAATGAGATATTT  
M-1SR H-1SR AATCTGGAATTTGACAGCAATCAAACTTTTTTAAAGCACTTCACGCTGACACAAAGGATTAAGAGTGTCTTATTTGCTAAATACAAATTAATTAATTCGATATTTATGCTG  
M-1SR H-1SR GTGTCTACAGTGTCTTATTTGACACATTAATTTGTTCTGATTAAATCTAATACGAAAAACAATGTAATTAAGTGAATAGATATTTGCTCAGTGAAGCTTTTAAATTTATTTATG  
M-1SR H-1SR GAGAAATTTTGATGTGTAATAAAGGGAATACACAAAGA

**Figure S1.** Homology alignment of M-ISR and H-ISR (<https://www.genome.jp/tools-bin/clustalw>).

# Figure S2

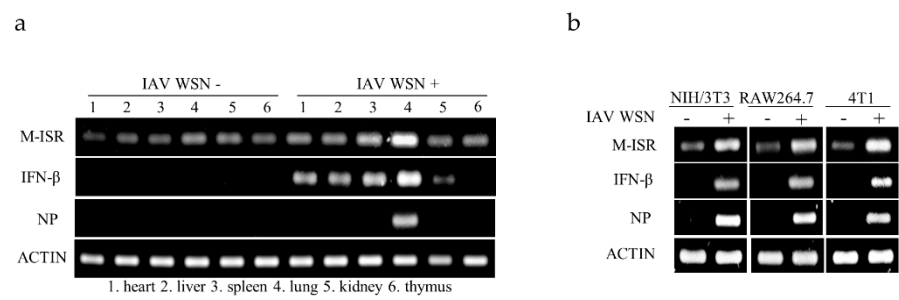

**Figure S2.** (a) The levels of lncRNA ISR and IFN-β expression in the organs of mice infected with or without IAV WSN for 24 hours were measured by RT-PCR. Lane 1-6: heart, liver, spleen, lung, kidney, and thymus; (b) The levels of lncRNA ISR and IFN-β in indicated mouse cell lines infected with or without IAV WSN (MOI=0.8) for 16 hours were examined by RT-PCR.
